# Supplementary material for: International perceptions of animals and the importance of their welfare
Source: Frontiers journal article supplement (doi:10.3389/fanim.2022.960379), 2022-08-18
Supplement: Data_Sheet_1.PDF [file Data_Sheet_1.PDF]

# Supplementary Material

## International perceptions of animals and the importance of their welfare

### Full Questionnaire – English

#### Preliminary

“I understand what ‘animal welfare’ means”

- ☐ Yes
- ☐ Some
- ☐ No

#### *Animal welfare definition*

"The welfare of animals' refers to how well an animal is coping with the conditions in which it lives. An animal has good welfare if its needs are being met and hence it is healthy, comfortable, well nourished, safe, able to express important behaviour and not suffering from unpleasant states such as pain, fear and distress"

-adapted from World Organisation for Animal Health (OIE)

#### Section 1: Core Perceptions

Please state your level of agreement with the following statements on a scale of 1-7 (strongly disagree to strongly agree).

- (1) Strongly disagree;
- (2) Disagree;
- (3) Somewhat disagree;
- (4) Neither agree nor disagree;
- (5) Somewhat agree;
- (6) Agree;
- (7) Strongly agree

1. The welfare of farmed animals in <country name> is important to me \*

[illegible]

2. The welfare of companion animals in <country name> is important to me \*

\*Companion animals: animals that live in our homes with us

[illegible]

3. If I could afford it, I would pay more to buy products that are kinder to animals \*

[illegible]

4. I think people in <country> are more careful to understand where the animal products they eat come from since Covid-19 \*

(Q4) ☐ 1 ☐ 2 ☐ 3 ☐ 4 ☐ 5 ☐ 6 ☐ 7

5. I think it is important to have laws that protect the welfare of animals in <country name> \*

(Q5)      1            2            3            4            5            6            7

○ ○ ○ ○ ○ ○ ○

## Section 2: Species Perceptions

Please state your level of agreement with the following statements on a scale of 1-7 (strongly disagree to strongly agree).

- (1) Strongly disagree;
- (2) Disagree;
- (3) Somewhat disagree;
- (4) Neither agree nor disagree;
- (5) Somewhat agree;
- (6) Agree;
- (7) Strongly agree

[illegible][illegible][illegible][illegible]

## 10. Fish experience emotions \*

[illegible]

## Section 2b: Species Perceptions (Importance of welfare)

Please state the importance on a scale of 1-7 (very unimportant to very important).

- (1) Extremely unimportant
- (2) Unimportant
- (3) Somewhat unimportant
- (4) I do not have an opinion/ I don't know the species
- (5) Somewhat important
- (6) Important
- (7) Extremely important

11. How important is the physical and mental welfare of the following species? \*

[illegible]

### Section 3: Egg production systems

Please state your level of agreement with the following statements on a scale of 1-7 (strongly disagree to strongly agree).

- (1) Strongly disagree;
- (2) Disagree;
- (3) Somewhat disagree;
- (4) Neither agree nor disagree;
- (5) Somewhat agree;
- (6) Agree;
- (7) Strongly agree

12. It matters to me that the chickens producing eggs do not suffer \*

|       | 1                     | 2                     | 3                     | 4                     | 5                     | 6                     | 7                     |
|-------|-----------------------|-----------------------|-----------------------|-----------------------|-----------------------|-----------------------|-----------------------|
| (Q12) | <input type="radio"/> |

13. I would prefer to buy eggs from chickens that have not been kept in cages \*

|       | 1                     | 2                     | 3                     | 4                     | 5                     | 6                     | 7                     |
|-------|-----------------------|-----------------------|-----------------------|-----------------------|-----------------------|-----------------------|-----------------------|
| (Q13) | <input type="radio"/> |

14. I think that most of the egg laying hens in <country> are kept in cages \*

- ☐ Yes
- ☐ No
- ☐ I don't know

☐ No

(Q17)      1                  2                  3                  4                  5                  6                  7

○ ○ ○ ○ ○ ○ ○

18. I think that most the animals in <country> are fully conscious and aware at the moment they are slaughtered \*

- ☐ Yes
- ☐ No
- ☐ I don't know

19. I think that stunning an animal unconscious the moments before they are slaughtered is better for the animal \*

(Q19) ☐ 1 ☐ 2 ☐ 3 ☐ 4 ☐ 5 ☐ 6 ☐ 7

20. I think stunning the animals unconscious will reduce the taste of the meat \*

[illegible]

21. I would prefer to eat meat from animals that are made unconscious for slaughter \*

(Q21) ☐ 1 ☐ 2 ☐ 3 ☐ 4 ☐ 5 ☐ 6 ☐ 7

22. I would prefer to eat meat from animals that are killed using religious methods for slaughter \*

(Q22) ☐ 1 ☐ 2 ☐ 3 ☐ 4 ☐ 5 ☐ 6 ☐ 7

23. Do you eat meat? \*

☐ Yes

☐ No

### Final Question

Please state your level of agreement with the following statements on a scale of 1-7 (strongly disagree to strongly agree).

- (1) Strongly disagree;
- (2) Disagree;
- (3) Somewhat disagree;
- (4) Neither agree nor disagree;
- (5) Somewhat agree;
- (6) Agree;
- (7) Strongly agree

24. The welfare of farmed animals in <country name> is important to me \*

|       | 1                     | 2                     | 3                     | 4                     | 5                     | 6                     | 7                     |
|-------|-----------------------|-----------------------|-----------------------|-----------------------|-----------------------|-----------------------|-----------------------|
| (Q24) | <input type="radio"/> |

### Demographics

What gender do you identify as?

☐ Male

☐ Female

☐ Prefer not to say



Please indicate your highest formal education level

- ☐ None
- ☐ Primary school
- ☐ Secondary school
- ☐ Course after finishing high school (other than university)
- ☐ University

Please indicate your age group

- ☐ 18-29
- ☐ 30-39
- ☐ 40-49
- ☐ 50-59
- ☐ 60+

Please indicate your religion

- ☐ No religion
- ☐ Bahai' Faith
- ☐ Buddhism
- ☐ Caodaism
- ☐ Chinese folk religion
- ☐ Chondogyo
- ☐ Christianity
- ☐ Confucianism
- ☐ Hinduism
- ☐ Islam
- ☐ Jainism
- ☐ Judaism
- ☐ Shinto
- ☐ Sikhism
- ☐ Taoism
- ☐ Other
- ☐ Catholicism

**<End data collection>**

Note: For the nations in which participant selection and engagement with the research tool was conducted entirely online (UK, USA and Brazil), an additional 'mid-way check' question in the relevant language was included after question 11 and before question 12.

How important is reading a question instead of simply clicking numbers to finish quickly?

As you are at the midway point this is a check to ensure you are still reading the questions. Please select 4.

|        | 1                     | 2                     | 3                     | 4                     | 5                     | 6                     | 7                     |
|--------|-----------------------|-----------------------|-----------------------|-----------------------|-----------------------|-----------------------|-----------------------|
| (Q11b) | <input type="radio"/> |

This research tool was translated into Arabic, Bahasa Malay, Bengali, Hindi, Portuguese, Spanish, Traditional Chinese/Mandarin and Urdu.

Supplementary material for *'International perception of animals and the importance of their welfare'*, by Michelle Sinclair, Natasha Y.P. Lee, Maria J. Hötzel, Maria C. de Luna, Arvind Sharma, Musadiq Idris, Tessa Derkley, Congcong Li, Muhammad A. Islam, Oluwaseun S. Iyasere, Grisel N. Otárola, Abdelkareem A. Ahmed, Chanadda Khruapradab, Michael Curry, Georgette L. Burns, Jeremy N. Marchant.
